# Supplementary material for: In-silico analysis reveals druggable single nucleotide polymorphisms in angiotensin 1 converting enzyme involved in the onset of blood pressure
Source: BMC Res Notes. 2021 Dec 20;14:457. doi: 10.1186/s13104-021-05879-z (PMC8686250; doi:10.1186/s13104-021-05879-z)
Supplement: Supplementary file 1 — Additional file 1: Table S1. Nonsynonymous Single Nucleotide Polymorphism of ACE1 gene retrieved from NCBI dbSNP database. Table S2. a Deleterious or disease-causing SNPs across the six in silico tools (SNPs&GO, PROVEAN, PhD-SNP, Polyphen-2, PANTHER and SIFT). b SIFT predictive result of deleterious of nsSNPs. c SNPs&GO deleterious nsSNPs prediction. d PROVEAN predictive result of deleterious or disease-causing nsSNPs. e Polyphen-2 predictive result of deleterious or disease-causing nsSNPs. Table S3. a INSP protein stability predictions for nsSNPs in ACE1. b MUpro stability prediction result for MUpro_NN and MUpro_SVM. c I-Mutant prediction result for ACE1 protein stability. d istable server protein stability prediction using MUpro_SVM, MUpro_NN, iPTREE- STAB and I-Mutant. Table S4. Consurf conservation prediction analysis. [file 13104_2021_5879_MOESM1_ESM.xlsx]

## Sheet:  REVIEW
Overview of Supplementary Tables
Supplementary table 1: Nonsynonymous Single Nucleotide Polymorphism OF ACE gene	Nonsynonymous Single Nucleotide Polymorphism of ACE gene
Supplementary table 2a	Deleterious or disease-causing SNPs across the six in silico tools (SNPs&GO, PROVEAN, PhD-SNP, Polyphen-2, PANTHER and SIFT)
Supplementary table 2b	SIFT predictive result of deleterious of nsSNPs
Supplementary Table 2c	SNPs&GO deleterious nsSNPs prediction
Supplementary Table 2d	PROVEAN predictive result of deleterious or disease-causing nsSNPs
Supplementary Table 2e	Polyphen-2 predictive result of deleterious or disease-causing nsSNPs
Supplementary Table 3a	INSP protein stability predictions for nsSNPs in ACE
Supplementary Table 3b	MUpro stability prediction result for MUpro_NN and MUpro_SVM
Supplementary Table 3c	I-Mutant prediction result for ACE protein stability
Supplementary Table 3d	istable server protein stability prediction using MUpro_SVM, MUpro_NN, iPTREE- STAB and I-Mutant
Supplementary Table 4	Consurf conservation prediction analysis

## Sheet:  S.Table 1
Supplementary table 1: Nonsynonymous Single Nucleotide Polymorphism OF ACE gene
SNPs	NUCLEOTIDE CHANGE	AMINO ACID CHANGE	GENE CONSEQUENCE	GENE ID
rs4362	F [TTT] > L [TTA]	F1129L	Coding sequence variant	ENSG00000159640
rs2229839	P [CCG] > R [CGG]	P351R	Coding sequence variant	ENSG00000159641
rs3730043	T [ACG] > M [ATG]	T916M	Coding sequence variant	ENSG00000159642
rs12709426	D [GAT] > G [GGT]	D592G	Coding sequence variant	ENSG00000159643
rs12709442	T [ACG] > M [ATG]	T1187M	Coding sequence variant	ENSG00000159644
rs4980	R [CGG] > Q [CAG]	R1279Q	Coding sequence variant	ENSG00000159645
rs12720742	T [ACG] > R [AGG]	T1210R	Coding sequence variant	ENSG00000159646
rs12720754	A [GCC] > T [ACC]	A183T	Coding sequence variant	ENSG00000159647
rs13306091	M [ATG] > T [ACG]	M828T	Coding sequence variant	ENSG00000159648
rs35865660	R [CGT] > H [CAT]	R442H	Coding sequence variant	ENSG00000159649
rs56394458	G [GGG] > R [AGG]	G354R	Coding sequence variant	ENSG00000159650
rs72845024	G [GGC] > S [AGC]	G639S	Coding sequence variant	ENSG00000159651
rs117647476	I [ATC] > L [CTC]	I798V	Coding sequence variant	ENSG00000159652
rs139263584	Q [CAG] > E [GAG]	Q725E	Coding sequence variant	ENSG00000159653
rs140980792	D [GAC] > N [AAC]	D1045N	Coding sequence variant	ENSG00000159654
rs141543325	R [CGC] > C [TGC]	R228C	Coding sequence variant	ENSG00000159655
rs142947404	N [AAC] > K [AAA]	N1036K	Coding sequence variant	ENSG00000159656
rs143507892	R [CGG] > Q [CAG]	R953Q	Coding sequence variant	ENSG00000159657
rs144137849	S [AGT] > G [GGT]	S310G	Coding sequence variant	ENSG00000159658
rs146089353	R [CGC] > H [CAC]	R857H	Coding sequence variant	ENSG00000159659
rs148193919	D [GAC] > N [AAC]	D353N	Coding sequence variant	ENSG00000159660
rs148943954	P [CCT] > A [GCT]	P505A	Coding sequence variant	ENSG00000159661
rs148995315	E [GAG] > K [AAG]	E767K	Coding sequence variant	ENSG00000159662
rs201762720	D [GAT] > N [AAT]	D514N	Coding sequence variant	ENSG00000159663
rs367916721	G [GGC] > S [AGC]	G1241S	Coding sequence variant	ENSG00000159664
rs387906576	L [CTG] > P [CC]	L440P	Coding sequence variant	ENSG00000159665
rs540734174	G [GGC] > A [GCC]	G1013A	Coding sequence variant	ENSG00000159666
rs558593002	G [GGG] > E [GAG]	G2E	Coding sequence variant	ENSG00000159667
rs559585445	M [ATG] > V [GTG]	M774V	Coding sequence variant	ENSG00000159668
rs756742824	S [TCC] > Y [TAC]	S1230Y	Coding sequence variant	ENSG00000159669
rs757874491	P [CCT] > S [TCT]	P876S	Coding sequence variant	ENSG00000159670
rs759719543	P [CCC] > T [ACC]	P580T	Coding sequence variant	ENSG00000159671
rs759857038	V [GTG] > M [ATG]	V1257M	Coding sequence variant	ENSG00000159672
rs761345398	R [CGA] > Q [CAA]	R496Q	Coding sequence variant	ENSG00000159673
rs762585402	G [GGC] > S [AGC]	G590S	Coding sequence variant	ENSG00000159674
rs765069550	H [CAC] > Y [TAC]	H1293Y	Coding sequence variant	ENSG00000159675
rs767085054	G [GGC] > D [GAC]	G128D	Coding sequence variant	ENSG00000159676
rs767880620	A [GCA] > E [GAA]	A730E	Coding sequence variant	ENSG00000159677
rs772433710	Q [CAG] > K [AAG]	Q998K	Coding sequence variant	ENSG00000159678
rs779833433	A [GCC] > P [CCC]	A961P	Coding sequence variant	ENSG00000159679
rs886053219	S [TCC] > F [TTC]	S55F	Coding sequence variant	ENSG00000159680
rs886053220	S [AGT] > N [AAT]	S480N	Coding sequence variant	ENSG00000159681
rs886053221	G [GGG] > R [AGG]	G501R	Coding sequence variant	ENSG00000159682
rs886053223	L [CTG] > P [CCG]	L770P	Coding sequence variant	ENSG00000159683
rs886053224	H [CAC] > L [CTC]	H861L	Coding sequence variant	ENSG00000159684
rs886053225	L [CTG] > Q [CAG]	L879Q	Coding sequence variant	ENSG00000159685
rs886053226	P [CCC] > L [CTC]	P1295L	Coding sequence variant	ENSG00000159686
rs1219522144	I [AT] > Q [C]	I717Q	Coding sequence variant	ENSG00000159687
rs1357918249	L [CTC] > F [TTC]	L273F	Coding sequence variant	ENSG00000159688
rs1568039403	Q [CAG] > A [GCAG]	Q582A	Coding sequence variant	ENSG00000159689
rs1568047328	D [GAC] > G [GGC]	D1112G	Coding sequence variant	ENSG00000159690
rs1568048955	P [CCG] > V [GTG]	P1180V	Coding sequence variant	ENSG00000159691
rs1599143221	Q [CAG] > K [AAG]	Q582K	Coding sequence variant	ENSG00000159692
rs4976	I [ATT] > T [ACT]	I1018T	Coding sequence variant	ENSG00000159693
rs4977	F [TTT] > V [GTT]	F1051V	Coding sequence variant	ENSG00000159694
rs4981	Q [CAG] > P [CCG]	Q1296P	Coding sequence variant	ENSG00000159695
rs3730025	Y [TAC] > S [TCC]	Y244S	Coding sequence variant	ENSG00000159696
rs12720745	R [CGG] > Q [CAG]	R1290Q	Coding sequence variant	ENSG00000159697
rs12720746	V [GTG] > A [GCG]	V524A	Coding sequence variant	ENSG00000159698
rs13306085	R [CGG] > Q [CAG]	R379Q	Coding sequence variant	ENSG00000159699
rs28730839	P [CCT] > H [CAT]	P485H	Coding sequence variant	ENSG00000159700
rs34126458	A [GCC] > T [ACC]	A319T	Coding sequence variant	ENSG00000159701
rs56038824	Q [CAG] > E [GAG]	Q1254E	Coding sequence variant	ENSG00000159702
rs56397451	S [AGC] > T [AC]	S181T	Coding sequence variant	ENSG00000159703
rs61740982	V [GTG] > M [ATG]	V297M	Coding sequence variant	ENSG00000159704
rs147670020	R [CGC] > S [AGC]	R260S	Coding sequence variant	ENSG00000159705
rs147763588	V [GTC] > I [ATC]	V1069I	Coding sequence variant	ENSG00000159706
rs148018765	V [GTG] > M [ATG]	V423M	Coding sequence variant	ENSG00000159707
rs148144906	S [AGC] > I [ATC]	S211I	Coding sequence variant	ENSG00000159708
rs148460287	P [CCG] > L [CTG]	P202L	Coding sequence variant	ENSG00000159709
rs149252911	G [GGC] > S [AGC]	G415S	Coding sequence variant	ENSG00000159710
rs149590791	E [GAG] > K [AAG]	E1213K	Coding sequence variant	ENSG00000159711
rs150011877	R [CGC] > H [CAC]	R260H	Coding sequence variant	ENSG00000159712
rs150057535	L [TTG] > M [ATG]	L894M	Coding sequence variant	ENSG00000159713
rs150382846	E [GAA] > K [AAA]	E85K	Coding sequence variant	ENSG00000159714
rs150466411	T [ACG] > M [ATG]	T381M	Coding sequence variant	ENSG00000159715
rs151017978	D [GAC] > E [GAA]	D218E	Coding sequence variant	ENSG00000159716
rs185115105	D [GAC] > N [AAC]	D450N	Coding sequence variant	ENSG00000159717
rs188993222	K [AAG] > N [AAC]	K722N	Coding sequence variant	ENSG00000159718
rs189243320	R [AGG] > S [AGT]	R373S	Coding sequence variant	ENSG00000159719

## Sheet:  S.Table 2a
Supplementary table 2a: DELETERIOUS OR DISEASE CAUSING SNPs ACROSS THE SIX IN SILICO TOOLS (SNPs&GO, PROVEAN, PHD, POLYPHEN, PANTHER and SIFT)
SNP	AMINO_ACID	PROVEAN	SNPs&GO	PANTHER	PhD-SNP	POLYPHEN-2	SIFT
rs4362	F1129L	-4.953	5		7
rs2229839	P351R	-4.686	5		6	0.832	0.002
rs3730043	T916M	-4.314	4	4		0.998
rs12709442	T1187M	-5.114	3	6		1	0.001
rs56394458	G354R	-3.045	1		1
rs141543325	R228C	-4.327	6		8		0.004
rs143507892	R953Q	-3.521	7	4	5		0.026
rs146089353	R857H	-3.622	7		9		0.032
rs148193919	D353N	-2.576					0.047
rs148943954	P505A	-4.444	0		5		0.015
rs148995315	E767K	-2.902	4		1		0.019
rs201762720	D514N	-2.745	5		8		0.002
rs387906576	L440P	-4.289
rs540734174	G1013A	-3.631	6	7	2
rs559585445	M774V	-2.656
rs757874491	P876S	-6.766	8	8	5
rs759719543	P580T	-3.329
rs762585402	G590S	-3.325	3		5
rs767085054	G128D	-2.542	5		6
rs767880620	A730E	-3.381
rs772433710	Q998K	-3.337	5		6
rs779833433	A961P	-4.284	9	4	9
rs886053221	G501R	-4.21	4		8
rs886053223	L770P	-5.706	8	8	7
rs886053224	H861L	-3.37	4		2
rs886053225	L879Q	-4.633	8	7	7
rs1219522144	I717Q	-3.388	6	6
rs1568047328	D1112G	-6.274	9	8	6
rs1568048955	P1180V	-6.272	1
rs4976	I1018T	-3.654	7	1	4	0.999	0.002
rs4977	F1051V	-4.45	3		4	0.954	0.043
rs3730025	Y244S	-4.641			0		0.001
rs28730839	P485H	-3.593					0.04
rs886053220	S480N		4		0
rs28730839	P485H	-3.593	2		5
rs761345398	R496Q		5		6
rs117647476	G639S				0
rs756742824	S1230Y		1		2
rs56038824	Q1254E				1
rs759857038	V1257M				2
rs4980	R1279Q		3		7
rs12720745	R1290Q		1		0
rs765069550	H1293Y				1
rs886053226	P1259L		2		4
rs4981	Q1296P		4		4
rs56394458	G354R		1		1	0.998
rs142947404	N1036K						0.042
rs12720746	V524A						0.019
rs147670020	R260S	-2.833	2		4
rs150011877	R260H				2
rs189243320	R373S	-3.791	8		8		0
rs150466411	T381M	-3.057			0		0.01
rs149252911	G415S	-3.032	3		7		0
rs148144906	S211I	-2.825
rs148460287	P202L	-2.897					0.03
rs56397451	S181T						0.03
rs151017978	D218E						0.02
rs148018765	V423M						0.01
rs150057535	L894M						0.02

## Sheet:  S.Table 2b
Supplementary table2b: SIFT PREDICTIVE RESULT OF DELETERIOUS nsSNPs
SNP	ORGANISM_BUILD	CHR	COORDINATE	REF_ALLELE	ALT_ALLELE	AMINO_ACID_CHANGE	GENE_NAME	GENE_ID	REGION	SIFT_SCORE	SIFT_MEDIAN	NO_OF_SEQS_AT_POSITION	SIFT_PREDICTION
rs2229839	Homo_sapiens/GRCh37.74	17	61559033	C	T	P351L	ACE	ENSG00000159640	CDS	0.034	2.65	69	DELETERIOUS
rs12709426	Homo_sapiens/GRCh37.74	17	61561756	A	G	D592G	ACE	ENSG00000159640	CDS	0.197	2.7	141	TOLERATED
rs12709442	Homo_sapiens/GRCh37.74	17	61574215	C	T	T1187M	ACE	ENSG00000159640	CDS	0.001	2.86	98	DELETERIOUS
rs12720754	Homo_sapiens/GRCh37.74	17	61557165	G	A	A183T	ACE	ENSG00000159640	CDS	0.337	2.65	69	TOLERATED
rs13306091	Homo_sapiens/GRCh37.74	17	61566335	T	C	M828T	ACE	ENSG00000159640	CDS	0.577	2.88	98	TOLERATED
rs35865660	Homo_sapiens/GRCh37.74	17	61560033	G	A	R442H	ACE	ENSG00000159640	CDS	0.166	2.91	49	TOLERATED
rs117647476	Homo_sapiens/GRCh37.74	17	61566095	A	G	I798V	ACE	ENSG00000159640	CDS	0.352	2.89	98	TOLERATED
rs139263584	Homo_sapiens/GRCh37.74	17	61564032	C	G	Q725E	ACE	ENSG00000159640	CDS	0.094	2.93	44	TOLERATED
rs140980792	Homo_sapiens/GRCh37.74	17	61571017	G	C	D1045H	ACE	ENSG00000159640	CDS	0.518	2.97	42	TOLERATED
rs141543325	Homo_sapiens/GRCh37.74	17	61557724	C	T	R228C	ACE	ENSG00000159640	CDS	0.004	2.91	49	DELETERIOUS
rs142947404	Homo_sapiens/GRCh37.74	17	61570992	C	A	N1036K	ACE	ENSG00000159640	CDS	0.042	2.97	43	DELETERIOUS
rs143507892	Homo_sapiens/GRCh37.74	17	61568688	G	A	R953Q	ACE	ENSG00000159640	CDS	0.026	2.86	99	DELETERIOUS
rs144137849	Homo_sapiens/GRCh37.74	17	61558532	A	G	S310G	ACE	ENSG00000159640	CDS	0.156	2.92	43	TOLERATED
rs146089353	Homo_sapiens/GRCh37.74	17	61566422	G	A	R857H	ACE	ENSG00000159640	CDS	0.032	2.88	98	DELETERIOUS
rs148193919	Homo_sapiens/GRCh37.74	17	61559038	G	A	D353N	ACE	ENSG00000159640	CDS	0.047	2.84	137	DELETERIOUS
rs148943954	Homo_sapiens/GRCh37.74	17	61560846	C	G	P505A	ACE	ENSG00000159640	CDS	0.015	2.91	49	DELETERIOUS
rs148995315	Homo_sapiens/GRCh37.74	17	61564428	G	A	E767K	ACE	ENSG00000159640	CDS	0.019	2.98	42	DELETERIOUS
rs201762720	Homo_sapiens/GRCh37.74	17	61560873	G	A	D514N	ACE	ENSG00000159640	CDS	0.002	2.91	49	DELETERIOUS
rs367916721	Homo_sapiens/GRCh37.74	17	61574527	G	A	G1241S	ACE	ENSG00000159640	CDS	0.399	3.67	27	TOLERATED
rs4976	Homo_sapiens/GRCh37.74	17	61570937	T	C	I1018T	ACE	ENSG00000159640	CDS	0.002	2.86	100	DELETERIOUS
rs4977	Homo_sapiens/GRCh37.74	17	61571297	T	G	F1051V	ACE	ENSG00000159640	CDS	0.043	2.97	42	DELETERIOUS
rs4981	Homo_sapiens/GRCh37.74	17	61574693	A	C	Q1296P	ACE	ENSG00000159640	CDS	0.056	3.94	18	TOLERATED
rs3730025	Homo_sapiens/GRCh37.74	17	61557773	A	G	Y244C	ACE	ENSG00000159640	CDS	0.001	2.7	144	DELETERIOUS
rs12720745	Homo_sapiens/GRCh37.74	17	61574675	G	A	R716Q	ACE	ENSG00000159640	CDS	0.26	3.79	17	TOLERATED
rs12720746	Homo_sapiens/GRCh37.74	17	61560904	T	C	V524A	ACE	ENSG00000159640	CDS	0.019	2.7	146	DELETERIOUS
rs13306085	Homo_sapiens/GRCh37.74	17	61559844	G	A	R379Q	ACE	ENSG00000159640	CDS	0.534	2.92	48	TOLERATED
rs28730839	Homo_sapiens/GRCh37.74	17	61560501	C	G	P485R	ACE	ENSG00000159640	CDS	0.04	2.91	49	DELETERIOUS
rs56038824	Homo_sapiens/GRCh37.74	17	61574566	C	G	Q1254E	ACE	ENSG00000159640	CDS	0.246	3.74	27	TOLERATED
rs56397451	Homo_sapiens/GRCh37.74	17	61557160	G	#VALUE!	S181T	ACE	ENSG00000159641	CDS	0.03	3.08	17	DELETERIOUS
rs61740982	Homo_sapiens/GRCh37.74	17	61558493	G	A	V297M	ACE	ENSG00000159642	CDS	0.22	3.08	17	TOLERATED
rs147670020	Homo_sapiens/GRCh37.74	17	61557820	C	A	R260S	ACE	ENSG00000159643	CDS	0.54	3.08	17	TOLERATED
rs147763588	Homo_sapiens/GRCh37.74	17	61571351	G	A	V1069I	ACE	ENSG00000159644	CDS	1	3.08	17	TOLERATED
rs148018765	Homo_sapiens/GRCh37.74	17	61559975	G	A	V423M	ACE	ENSG00000159645	CDS	0.01	3.08	17	DELETERIOUS
rs148144906	Homo_sapiens/GRCh37.74	17	61557250	G	T	S211I	ACE	ENSG00000159646	CDS	0.16	3.08	17	TOLERATED
rs148460287	Homo_sapiens/GRCh37.74	17	61557223	C	T	P202L	ACE	ENSG00000159647	CDS	0.03	3.08	17	DELETERIOUS
rs149252911	Homo_sapiens/GRCh37.74	17	61559951	G	A	G415S	ACE	ENSG00000159648	CDS	0	3.08	17	DELETERIOUS
rs149590791	Homo_sapiens/GRCh37.74	17	61574292	G	A	E1213K	ACE	ENSG00000159649	CDS	0.94	3.18	17	TOLERATED
rs150011877	Homo_sapiens/GRCh37.74	17	61557821	G	A	R260H	ACE	ENSG00000159650	CDS	0.54	3.08	17	TOLERATED
rs150057535	Homo_sapiens/GRCh37.74	17	61568353	T	A	L894M	ACE	ENSG00000159651	CDS	0.02	3.08	17	DELETERIOUS
rs150382846	Homo_sapiens/GRCh37.74	17	61555295	G	A	E85K	ACE	ENSG00000159652	CDS	0.15	3.14	17	TOLERATED
rs150466411	Homo_sapiens/GRCh37.74	17	61559850	C	T	T381M	ACE	ENSG00000159653	CDS	0.01	3.08	17	DELETERIOUS
rs151017978	Homo_sapiens/GRCh37.74	17	61557272	C	A	D218E	ACE	ENSG00000159654	CDS	0.02	3.08	17	DELETERIOUS
rs185115105	Homo_sapiens/GRCh37.74	17	61560395	G	A	D450N	ACE	ENSG00000159655	CDS	0.41	3.08	17	TOLERATED
rs188993222	Homo_sapiens/GRCh37.74	17	61564025	G	C	K722N	ACE	ENSG00000159656	CDS	0.19	3.08	17	TOLERATED
rs189243320	Homo_sapiens/GRCh37.74	17	61559827	G	A	R373S	ACE	ENSG00000159657	CDS	0	3.08	17	DELETERIOUS

## Sheet:  S.Table 2c
Supplementary Table 2c: SNPs&GO deleterious nsSNPs prediction.
Mutation	Prediction	RI	Probability	Method
G2E	Neutral	4	0.322	PhD-SNP: F[G]=100% F[E]=0% Nali=7
	Neutral	3	0.358	SNPs&GO
S55F	Neutral	3	0.363	PhD-SNP: F[S]=22% F[F]=1% Nali=147
	Neutral	4	0.275	SNPs&GO
G128D	Disease	6	0.81	PhD-SNP: F[G]=68% F[D]=5% Nali=198
	Disease	5	0.736	SNPs&GO
S181T	Neutral	3	0.364	PhD-SNP: F[S]=10% F[T]=1% Nali=243
	Neutral	4	0.323	SNPs&GO
A183T	Neutral	3	0.34	PhD-SNP: F[A]=12% F[T]=2% Nali=242
	Neutral	4	0.301	SNPs&GO
R228C	Disease	8	0.915	PhD-SNP: F[R]=67% F[C]=0% Nali=244
	Disease	6	0.824	SNPs&GO
Y244S	Disease	0	0.502	PhD-SNP: F[Y]=24% F[S]=0% Nali=247
	Neutral	1	0.43	SNPs&GO
L273F	Neutral	3	0.373	PhD-SNP: F[L]=23% F[F]=0% Nali=243
	Neutral	4	0.306	SNPs&GO
V297M	Neutral	2	0.383	PhD-SNP: F[V]=45% F[M]=7% Nali=243
	Neutral	6	0.216	SNPs&GO
S310G	Neutral	7	0.171	PhD-SNP: F[S]=11% F[G]=2% Nali=244
	Neutral	6	0.223	SNPs&GO
A319T	Neutral	3	0.34	PhD-SNP: F[A]=32% F[T]=5% Nali=246
	Neutral	5	0.241	SNPs&GO
P351R	Disease	6	0.816	PhD-SNP: F[P]=86% F[R]=1% Nali=240
	Neutral	2	0.39	PANTHER: F[P]=56% F[R]=2%
	Disease	5	0.774	SNPs&GO
D353N	Neutral	0	0.5	PhD-SNP: F[D]=84% F[N]=7% Nali=236
	Neutral	6	0.2	PANTHER: F[D]=33% F[N]=5%
	Neutral	3	0.343	SNPs&GO
G354R	Disease	1	0.551	PhD-SNP: F[G]=65% F[R]=2% Nali=138
	Neutral	3	0.358	PANTHER: F[G]=36% F[R]=2%
	Disease	1	0.55	SNPs&GO
R379Q	Neutral	8	0.117	PhD-SNP: F[R]=15% F[Q]=14% Nali=243
	Neutral	7	0.131	PANTHER: F[R]=19% F[Q]=5%
	Neutral	7	0.131	SNPs&GO
R442H	Neutral	7	0.138	PhD-SNP: F[R]=6% F[H]=2% Nali=249
	Neutral	8	0.093	PANTHER: F[R]=11% F[H]=5%
	Neutral	7	0.162	SNPs&GO
S480N	Disease	0	0.507	PhD-SNP: F[S]=33% F[N]=11% Nali=250
	Neutral	2	0.382	PANTHER: F[S]=49% F[N]=2%
	Disease	4	0.704	SNPs&GO
P485H	Disease	5	0.775	PhD-SNP: F[P]=41% F[H]=0% Nali=244
	Neutral	5	0.241	PANTHER: F[P]=15% F[H]=2%
	Disease	2	0.62	SNPs&GO
R496Q	Disease	6	0.822	PhD-SNP: F[R]=70% F[Q]=4% Nali=248
	Neutral	5	0.261	PANTHER: F[R]=37% F[Q]=4%
	Disease	5	0.762	SNPs&GO
G501R	Disease	8	0.912	PhD-SNP: F[G]=98% F[R]=0% Nali=244
	Neutral	7	0.13	PANTHER: F[G]=19% F[R]=6%
	Disease	4	0.711	SNPs&GO
P505A	Disease	5	0.741	PhD-SNP: F[P]=92% F[A]=2% Nali=245
	Neutral	6	0.185	PANTHER: F[P]=36% F[A]=7%
	Disease	0	0.524	SNPs&GO
D514N	Disease	8	0.882	PhD-SNP: F[D]=98% F[N]=0% Nali=242
	Disease	5	0.738	SNPs&GO
V524A	Neutral	2	0.399	PhD-SNP: F[V]=6% F[A]=0% Nali=243
	Neutral	8	0.106	PANTHER: F[V]=18% F[A]=7%
	Neutral	4	0.321	SNPs&GO
P580T	Neutral	1	0.463	PhD-SNP: F[P]=70% F[T]=3% Nali=243
	Neutral	5	0.255	SNPs&GO
Q582A	Neutral	3	0.346	PhD-SNP: F[Q]=20% F[A]=0% Nali=243
	Neutral	3	0.35	SNPs&GO
Q582K	Neutral	3	0.352	PhD-SNP: F[Q]=20% F[K]=8% Nali=243
	Neutral	3	0.351	SNPs&GO
G590S	Disease	5	0.768	PhD-SNP: F[G]=90% F[S]=0% Nali=243
	Disease	3	0.665	SNPs&GO
D592G	Neutral	6	0.213	PhD-SNP: F[D]=11% F[G]=5% Nali=242
	Neutral	5	0.226	SNPs&GO
G639S	Disease	0	0.501	PhD-SNP: F[G]=65% F[S]=4% Nali=56
	Neutral	8	0.125	PANTHER: F[G]=16% F[S]=8%
	Neutral	4	0.277	SNPs&GO
I717Q	Neutral	2	0.381	PhD-SNP: F[I]=21% F[Q]=3% Nali=210
	Disease	6	0.802	PANTHER: F[I]=37% F[Q]=0%
	Disease	6	0.791	SNPs&GO
Q725E	Neutral	4	0.279	PhD-SNP: F[Q]=22% F[E]=0% Nali=214
	Neutral	6	0.184	PANTHER: F[Q]=19% F[E]=7%
	Neutral	4	0.31	SNPs&GO
A730E	Neutral	2	0.384	PhD-SNP: F[A]=44% F[E]=3% Nali=222
	Neutral	1	0.451	PANTHER: F[A]=40% F[E]=3%
	Neutral	1	0.45	SNPs&GO
E767K	Disease	1	0.573	PhD-SNP: F[E]=46% F[K]=1% Nali=224
	Neutral	2	0.386	PANTHER: F[E]=35% F[K]=4%
	Disease	4	0.693	SNPs&GO
L770P	Disease	7	0.846	PhD-SNP: F[L]=68% F[P]=0% Nali=238
	Disease	8	0.881	PANTHER: F[L]=59% F[P]=0%
	Disease	8	0.901	SNPs&GO
M774V	Neutral	2	0.375	PhD-SNP: F[M]=55% F[V]=8% Nali=239
	Neutral	4	0.308	PANTHER: F[M]=36% F[V]=6%
	Neutral	1	0.426	SNPs&GO
I798V	Neutral	4	0.315	PhD-SNP: F[I]=19% F[V]=7% Nali=242
	Neutral	7	0.171	PANTHER: F[I]=32% F[V]=14%
	Neutral	4	0.305	SNPs&GO
M828T	Neutral	7	0.159	PhD-SNP: F[M]=6% F[T]=0% Nali=235
	Neutral	7	0.129	PANTHER: F[M]=7% F[T]=5%
	Neutral	6	0.196	SNPs&GO
R857H	Disease	9	0.926	PhD-SNP: F[R]=96% F[H]=0% Nali=244
	Neutral	3	0.343	PANTHER: F[R]=51% F[H]=7%
	Disease	7	0.871	SNPs&GO
H861L	Disease	2	0.588	PhD-SNP: F[H]=16% F[L]=2% Nali=244
	Neutral	4	0.316	PANTHER: F[H]=16% F[L]=3%
	Disease	4	0.72	SNPs&GO
P876S	Disease	5	0.73	PhD-SNP: F[P]=90% F[S]=2% Nali=244
	Disease	8	0.894	PANTHER: F[P]=91% F[S]=0%
	Disease	8	0.892	SNPs&GO
L879Q	Disease	7	0.859	PhD-SNP: F[L]=83% F[Q]=0% Nali=244
	Disease	7	0.852	PANTHER: F[L]=64% F[Q]=0%
	Disease	8	0.91	SNPs&GO
T916M	Neutral	0	0.489	PhD-SNP: F[T]=58% F[M]=0% Nali=243
	Disease	4	0.719	PANTHER: F[T]=38% F[M]=0%
	Disease	4	0.723	SNPs&GO
R953Q	Disease	5	0.767	PhD-SNP: F[R]=84% F[Q]=3% Nali=239
	Disease	4	0.71	PANTHER: F[R]=76% F[Q]=2%
	Disease	7	0.868	SNPs&GO
A961P	Disease	9	0.935	PhD-SNP: F[A]=89% F[P]=0% Nali=243
	Disease	4	0.713	PANTHER: F[A]=62% F[P]=1%
	Disease	9	0.942	SNPs&GO
Q998K	Disease	6	0.803	PhD-SNP: F[Q]=48% F[K]=1% Nali=243
	Neutral	5	0.244	PANTHER: F[Q]=28% F[K]=7%
	Disease	5	0.737	SNPs&GO
G1013A	Disease	2	0.609	PhD-SNP: F[G]=78% F[A]=14% Nali=245
	Disease	7	0.833	PANTHER: F[G]=90% F[A]=1%
	Disease	6	0.794	SNPs&GO
I1018T	Disease	4	0.713	PhD-SNP: F[I]=44% F[T]=0% Nali=246
	Disease	1	0.572	PANTHER: F[I]=41% F[T]=2%
	Disease	7	0.85	SNPs&GO
N1036K	Neutral	7	0.143	PhD-SNP: F[N]=11% F[K]=3% Nali=246
	Neutral	1	0.467	PANTHER: F[N]=34% F[K]=2%
	Neutral	2	0.409	SNPs&GO
D1045N	Neutral	7	0.135	PhD-SNP: F[D]=25% F[N]=5% Nali=241
	Neutral	6	0.19	PANTHER: F[D]=12% F[N]=4%
	Neutral	7	0.153	SNPs&GO
F1051V	Disease	4	0.716	PhD-SNP: F[F]=40% F[V]=0% Nali=245
	Neutral	6	0.192	PANTHER: F[F]=19% F[V]=7%
	Disease	3	0.652	SNPs&GO
D1112G	Disease	6	0.821	PhD-SNP: F[D]=99% F[G]=0% Nali=237
	Disease	8	0.907	PANTHER: F[D]=89% F[G]=0%
	Disease	9	0.946	SNPs&GO
F1129L	Disease	7	0.842	PhD-SNP: F[F]=81% F[L]=4% Nali=238
	Neutral	5	0.27	PANTHER: F[F]=57% F[L]=12%
	Disease	5	0.736	SNPs&GO
P1180V	Neutral	3	0.348	PhD-SNP: F[P]=50% F[V]=0% Nali=236
	Neutral	0	0.489	PANTHER: F[P]=34% F[V]=2%
	Disease	1	0.561	SNPs&GO
T1187M	Neutral	2	0.377	PhD-SNP: F[T]=72% F[M]=0% Nali=235
	Disease	6	0.781	PANTHER: F[T]=53% F[M]=0%
	Disease	3	0.656	SNPs&GO
T1210R	Neutral	2	0.418	PhD-SNP: F[T]=13% F[R]=4% Nali=225
	Neutral	6	0.215	PANTHER: F[T]=17% F[R]=5%
	Neutral	2	0.392	SNPs&GO
S1230Y	Disease	2	0.613	PhD-SNP: F[S]=44% F[Y]=0% Nali=69
	Neutral	3	0.349	PANTHER: F[S]=14% F[Y]=1%
	Disease	1	0.531	SNPs&GO
G1241S	Neutral	5	0.226	PhD-SNP: F[G]=55% F[S]=14% Nali=28
	Neutral	9	0.07	PANTHER: F[G]=9% F[S]=13%
	Neutral	7	0.138	SNPs&GO
Q1254E	Disease	1	0.551	PhD-SNP: F[Q]=81% F[E]=6% Nali=31
	Neutral	6	0.177	PANTHER: F[Q]=33% F[E]=6%
	Neutral	0	0.475	SNPs&GO
V1257M	Disease	2	0.586	PhD-SNP: F[V]=63% F[M]=0% Nali=31
	Neutral	3	0.335	PANTHER: F[V]=36% F[M]=2%
	Neutral	1	0.425	SNPs&GO
R1279Q	Disease	7	0.825	PhD-SNP: F[R]=92% F[Q]=0% Nali=25
	Neutral	6	0.222	PANTHER: F[R]=37% F[Q]=5%
	Disease	3	0.663	SNPs&GO
R1290Q	Disease	0	0.515	PhD-SNP: F[R]=85% F[Q]=15% Nali=19
	Neutral	6	0.201	PANTHER: F[R]=34% F[Q]=4%
	Disease	1	0.528	SNPs&GO
H1293Y	Disease	1	0.525	PhD-SNP: F[H]=33% F[Y]=0% Nali=20
	Neutral	7	0.174	PANTHER: F[H]=9% F[Y]=1%
	Neutral	3	0.337	SNPs&GO
P1295L	Disease	4	0.709	PhD-SNP: F[P]=95% F[L]=0% Nali=20
	Neutral	5	0.245	PANTHER: F[P]=31% F[L]=3%
	Disease	2	0.587	SNPs&GO
Q1296P	Disease	4	0.711	PhD-SNP: F[Q]=91% F[P]=0% Nali=21
	Neutral	3	0.355	PANTHER: F[Q]=31% F[P]=1%
	Disease	4	0.691	SNPs&GO
E85K	Neutral	1	0.429	PhD-SNP: F[E]=51% F[K]=8% Nali=171
	Neutral	4	0.313	SNPs&GO
P202L	Neutral	1	0.436	PhD-SNP: F[P]=36% F[L]=1% Nali=243
	Neutral	5	0.261	SNPs&GO
S211I	Neutral	1	0.426	PhD-SNP: F[S]=26% F[I]=2% Nali=240
	Neutral	3	0.327	SNPs&GO
D218E	Neutral	1	0.425	PhD-SNP: F[D]=14% F[E]=1% Nali=243
	Neutral	4	0.298	SNPs&GO
R260H	Disease	2	0.594	PhD-SNP: F[R]=38% F[H]=6% Nali=248
	Neutral	1	0.435	SNPs&GO
R260S	Disease	4	0.689	PhD-SNP: F[R]=38% F[S]=3% Nali=248
	Disease	2	0.578	SNPs&GO
R373S	Disease	8	0.922	PhD-SNP: F[R]=90% F[S]=0% Nali=244
	Neutral	2	0.394	PANTHER: F[R]=55% F[S]=3%
	Disease	8	0.888	SNPs&GO
T381M	Disease	0	0.525	PhD-SNP: F[T]=43% F[M]=0% Nali=245
	Neutral	2	0.405	PANTHER: F[T]=26% F[M]=1%
	Neutral	2	0.415	SNPs&GO
G415S	Disease	7	0.849	PhD-SNP: F[G]=78% F[S]=1% Nali=249
	Neutral	7	0.153	PANTHER: F[G]=33% F[S]=7%
	Disease	3	0.663	SNPs&GO
V423M	Neutral	5	0.24	PhD-SNP: F[V]=31% F[M]=2% Nali=251
	Neutral	3	0.335	PANTHER: F[V]=33% F[M]=2%
	Neutral	5	0.252	SNPs&GO
D450N	Neutral	1	0.469	PhD-SNP: F[D]=50% F[N]=7% Nali=247
	Neutral	9	0.067	PANTHER: F[D]=28% F[N]=18%
	Neutral	7	0.153	SNPs&GO
K722N	Neutral	6	0.222	PhD-SNP: F[K]=30% F[N]=2% Nali=214
	Neutral	5	0.269	PANTHER: F[K]=29% F[N]=6%
	Neutral	6	0.185	SNPs&GO
L894M	Neutral	3	0.336	PhD-SNP: F[L]=51% F[M]=5% Nali=243
	Neutral	1	0.446	PANTHER: F[L]=41% F[M]=3%
	Neutral	4	0.281	SNPs&GO
V1069I	Neutral	5	0.265	PhD-SNP: F[V]=23% F[I]=21% Nali=246
	Neutral	8	0.11	PANTHER: F[V]=25% F[I]=33%
	Neutral	8	0.124	SNPs&GO
E1213K	Neutral	7	0.129	PhD-SNP: F[E]=13% F[K]=29% Nali=209
	Neutral	8	0.11	PANTHER: F[E]=14% F[K]=10%
	Neutral	6	0.224	SNPs&GO

## Sheet:  S.Table 2d
Supplementary table 2d: PROVEAN PREDICTIVE RESULT OF DELETERIOUS OR DISEASE CAUSING nsSNPs
SNP-ID	VARIANTS	PROVEAN SCORE	PREDICTION(cutoff = -2.5)
rs4362	F1129L	-4.953	Deleterious
rs4980	R1279Q	-1.378	Neutral
rs2229839	P351R	-4.686	Deleterious
rs3730043	T916M	-4.314	Deleterious
rs12709426	D592G	-1.718	Neutral
rs12709442	T1187M	-5.114	Deleterious
rs12720742	T1210R	-1.117	Neutral
rs12720754	A183T	0.053	Neutral
rs13306091	M828T	-0.934	Neutral
rs35865660	R442H	0.273	Neutral
rs56394458	G354R	-3.045	Deleterious
rs72845024	G639S	-0.852	Neutral
rs117647476	I798V	-0.572	Neutral
rs139263584	Q725E	-1.034	Neutral
rs140980792	D1045N	0.011	Neutral
rs141543325	R228C	-4.327	Deleterious
rs142947404	N1036K	-2.432	Neutral
rs143507892	R953Q	-3.521	Deleterious
rs144137849	S310G	-1.378	Neutral
rs146089353	R857H	-3.622	Deleterious
rs148193919	D353N	-2.576	Deleterious
rs148943954	P505A	-4.444	Deleterious
rs148995315	E767K	-2.902	Deleterious
rs201762720	D514N	-2.745	Deleterious
rs367916721	G1241S	-0.799	Neutral
rs387906576	L440P	-4.289	Deleterious
rs540734174	G1013A	-3.631	Deleterious
rs558593002	G2E	0.154	Neutral
rs559585445	M774V	-2.656	Deleterious
rs756742824	S1230Y	-1.415	Neutral
rs757874491	P876S	-6.766	Deleterious
rs759719543	P580T	-3.329	Deleterious
rs759857038	V1257M	-0.642	Neutral
rs761345398	R496Q	-2.347	Neutral
rs762585402	G590S	-3.325	Deleterious
rs765069550	H1293Y	-0.575	Neutral
rs767085054	G128D	-2.542	Deleterious
rs767880620	A730E	-3.381	Deleterious
rs772433710	Q998K	-3.337	Deleterious
rs779833433	A961P	-4.284	Deleterious
rs886053219	S55F	-1.877	Neutral
rs886053220	S480N	-0.856	Neutral
rs886053221	G501R	-4.21	Deleterious
rs886053223	L770P	-5.706	Deleterious
rs886053224	H861L	-3.37	Deleterious
rs886053225	L879Q	-4.633	Deleterious
rs886053226	P1295L	-2.006	Neutral
rs1219522144	I717Q	-3.388	Deleterious
rs1357918249	L273F	-1.205	Neutral
rs1568039403	Q582A	-1.943	Neutral
rs1568047328	D1112G	-6.274	Deleterious
rs1568048955	P1180V	-6.272	Deleterious
rs1599143221	Q582K	-1.57	Neutral
rs4976	I1018T	-3.654	Deleterious
rs4977	F1051V	-4.45	Deleterious
rs4981	Q1296P	-1.419	Neutral
rs3730025	Y244S	-4.641	Deleterious
rs12720745	R1290Q	-0.358	Neutral
rs12720746	V524A	-0.007	Neutral
rs13306085	R379Q	-0.438	Neutral
rs28730839	P485H	-3.593	Deleterious
rs34126458	A319T	-1.612	Neutral
rs56038824	Q1254E	-1.336	Neutral
rs56397451	S181T	-0.954	Neutral
rs61740982	V297M	-0.42	Neutral
rs147670020	R260S	-2.833	Deleterious
rs147763588	V1069I	-0.097	Neutral
rs148018765	V423M	-1.029	Neutral
rs148144906	S211I	-2.825	Deleterious
rs148460287	P202L	-2.897	Deleterious
rs149252911	G415S	-3.032	Deleterious
rs149590791	E1213K	0.204	Neutral
rs150011877	R260H	-2.344	Neutral
rs150057535	L894M	-1.185	Neutral
rs150382846	E85K	-0.959	Neutral
rs150466411	T381M	-3.057	Deleterious
rs151017978	D218E	-1.589	Neutral
rs185115105	D450N	-1.872	Neutral
rs188993222	K722N	-1.087	Neutral
rs189243320	R373S	-3.791	Deleterious

## Sheet:  S.Table 2e
Supplementary table2e: POLYPHEN-2 PREDICTIVE RESULT OF DELETERIOUS OR DISEASE CAUSING nsSNPs)
pos: postion
aa1: reference allele
aa2: alternate allele
acc: pdb accession
#snp id pos aa1 aa2 rsid acc pos aa1 aa2 nt1 nt2 prediction based_on effect pph2_class pph2_prob pph2_FPR pph2_TPR pph2_FDR site region PHAT dScore Score1 Score2 MSAv Nobs Nstruct Nfilt PDB_id PDB_pos PDB_ch ident length NormASA SecStr MapReg dVol dProp B-fact H-bonds AveNHet MinDHet AveNInt MinDInt AveNSit MinDSit Transv CodPos CpG MinDJxn PfamHit IdPmax IdPSNP IdQmin
rs4980 ? ? ? rs4980 P12821 1279 R Q G A benign alignment_mz ? neutral 0.002 0.824 0.989 0.434 NO PROPEP ? +0.590 -1.812 -2.402 3 25 40 ? ? ? ? ? ? ? ? ? ? ? ? ? ? ? ? ? ? ? 0 1 1 -145 NO 18.314 18.314 85.60
rs2229839 ? ? ? rs2229839 P12821 351 P L C T possibly damaging alignment ? deleterious 0.832 0.122 0.738 0.136 NO NO ? +1.066 -1.731 -2.797 2 281 40 20 2c6n 322 A 1.00 612 0.271 . b 55 1.07 1.31 ? ? ? ? ? ? ? 0 1 1 +67 PF01401.13 8.252 8.252 22.21
rs12709426 ? ? ? rs12709426 P12821 592 D G A G benign alignment ? neutral 0.047 0.374 0.929 0.277 NO NO ? -0.220 -2.707 -2.487 2 275 40 8 2c6n 563 A 1.00 612 0.537 S A -51 0.46 0.38 ? ? ? ? ? ? ? 0 1 0 -66 PF01401.13 9.370 9.370 30.40
rs12709442 ? ? ? rs12709442 P12821 1187 T M C T probably damaging alignment_mz ? deleterious 1 0 5e-05 0 NO NO ? +3.230 -1.067 -4.297 3 32 40 12 2oc2 582 A 1.00 584 0.187 H A 47 0.77 -0.14 ? ? ? ? ? ? ? 0 1 1 -57 PF01401.13 ? ? ?
rs12720754 ? ? ? rs12720754 P12821 183 A T G A benign alignment ? neutral 0.23 0.255 0.876 0.217 NO NO ? +0.148 -2.730 -2.878 2 287 40 8 2c6n 154 A 1.00 612 0.243 H A 28 0.22 -0.95 ? ? ? ? ? ? ? 0 0 1 -36 PF01401.13 4.858 4.858 30.40
rs13306091 ? ? ? rs13306091 P12821 828 M T T C benign alignment_mz ? neutral 0.072 0.342 0.919 0.261 NO NO ? +1.016 -2.417 -3.433 3 37 40 12 2oc2 223 A 1.00 584 0.363 G A -47 0.77 -0.17 ? ? ? ? ? 1 4.063 0 1 2 -34 PF01401.13 6.937 ? 84.46
rs56394458 ? ? ? rs56394458 P12821 354 G R G A probably damaging alignment ? deleterious 0.998 0.0152 0.18 0.0297 NO NO ? +2.508 -1.137 -3.645 2 63 40 20 2c6n 325 A 1.00 612 0.759 . l 113 0.91 1.31 ? ? ? ? ? ? ? 0 0 1 +59 PF01401.13 0.516 ? 11.64
rs4976 ? ? ? rs4976 P12821 1018 I T T C probably damaging alignment_mz ? deleterious 0.999 0.00759 0.0901 0.0148 NO NO ? +1.930 -1.302 -3.232 3 34 40 20 2c6n 391 A 0.55 605 0.000 H a -51 0.7 -0.35 ? ? ? ? ? 2 5.263 0 1 0 +84 PF01401.13 2.699 ? 54.06
rs4977 ? ? ? rs4977 P12821 1051 F V T G probably damaging alignment_mz ? deleterious 0.954 0.0806 0.637 0.107 NO NO ? +1.715 -1.477 -3.192 3 31 40 12 2oc2 446 A 1.00 584 0.118 H A -50 0.14 -0.66 ? ? ? ? ? ? ? 1 0 2 -15 PF01401.13 3.013 ? 62.79
rs4981 ? ? ? rs4981 P12821 1296 Q P A C benign alignment_mz ? neutral 0.185 0.27 0.885 0.225 NO PROPEP ? +1.838 -1.845 -3.683 3 23 40 ? ? ? ? ? ? ? ? ? ? ? ? ? ? ? ? ? ? ? 1 1 2 -196 NO 1.451 ? 78.18
rs3730025 ? ? ? rs3730025 P12821 244 Y C A G probably damaging alignment ? deleterious 0.998 0.0152 0.18 0.0297 NO NO ? +2.865 -2.139 -5.004 2 288 40 8 2c6n 215 A 1.00 612 0.050 H A -85 0.25 -0.78 ? ? ? 1 5.641 ? ? 0 1 0 -76 PF01401.13 0.322 ? 22.89
rs12720746 ? ? ? rs12720746 P12821 524 V A T C benign alignment ? neutral 0.15 0.287 0.894 0.234 NO NO ? +0.260 -3.029 -3.289 2 284 40 8 2c6n 495 A 1.00 612 0.233 T l -52 0.44 -1.19 ? ? ? ? ? ? ? 0 1 2 +16 PF01401.13 2.853 ? 36.37
rs13306085 ? ? ? rs13306085 P12821 379 R Q G A benign alignment ? neutral 0.04 0.385 0.933 0.282 NO NO ? -0.120 -2.720 -2.600 2 289 40 8 2c6n 350 A 1.00 612 0.799 . b -29 0.56 1.22 ? ? ? ? ? ? ? 0 1 1 -18 PF01401.13 4.652 4.652 30.40

## Sheet:  S.Table 3a
Supplementary table 3a: INSP protein stabilty predictions for nsSNPs in ACE.
Protein id: sp_P12821_ACE_HUMAN
Protein length: 1306
Mutation	DDG	EFFECT
P351R	-0.681741	decrease
R953Q	-1.23938	decrease
I1018T	-2.75895	decrease
F1051V	-1.94668	decrease
T1187M	-0.707824	decrease

## Sheet:  S.Table 3b
Supplementary Table 3b:Mupro stabilty prediction result for Mupro_NN and Mupro_SVM
DDG: Predicted both value and sign of energy change using SVM and sequence information
Mupro_SVM: Prediction of the sign (direction) of energy change using Support Vector Machine (SVM)
Prediction of the sign (direction) of energy change using Neural Network
Confidence score (CS)
POS	WT	MT	DDG	DDG Effect	Mupro_SVM CS	Mupro_SVM effect	Mupro_NN CS	Mupro effect
351	P	R	-0.79386	Decrease	0.159888	Increase	-0.596245	Decrease
953	R	Q	-0.895271	Decrease	-1	Decrease	-0.999912	Decrease
1018	I	T	-1.98577	Decrease	-1	Decrease	-0.906856	Decrease
1051	F	V	-1.13902	Decrease	-0.156855	Decrease	-0.539034	Decrease
1187	T	M	-0.250712	Decrease	0.272009	Increase	-0.726654	Decrease

## Sheet:  S.Table 3c
Supplementray Table 3c: I-Mutant prediction result for ACE protein stability
DDG<0: Decrease Stability
DDG>0: Increase Stability
TEMP: Temperature in Celsius degrees
pH: -log[H+]
MT: Mutant type
POS: Position
WT: Wild type
POS	WT	MT	PH	TEMP	DDG	EFFECT
351	P	R	7	25	-1.63	Decrease
953	R	Q	7	25	-0.81	Decrease
1018	I	T	7	25	-0.87	Decrease
1051	F	V	7	25	-0.06	Decrease
1187	T	M	7	25	-0.69	Decrease

[truncated: 2 more sheets:  S.Table 3d,  S.Table 4]
